# Supplementary material
Source: MDPI journal article supplement (https://www.mdpi.com/2072-4292/16/10/1785)
Supplement: s1 [file s1]

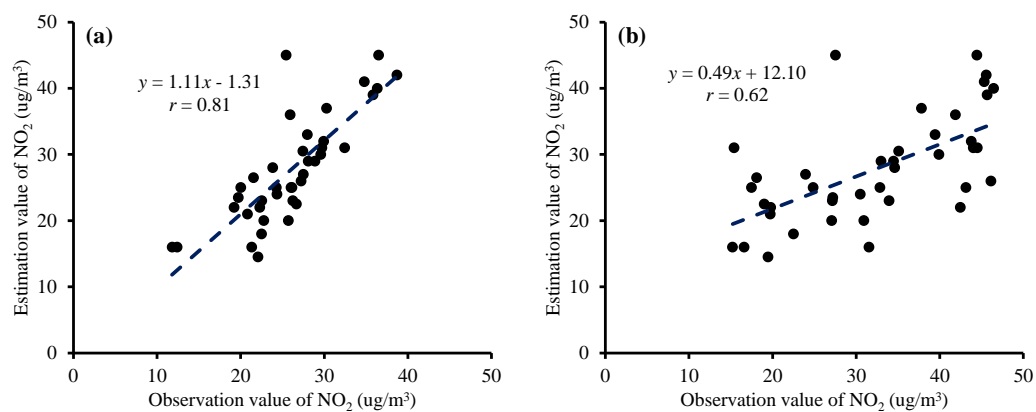

**Figure S1.** Comparison of newly near-ground NO<sub>2</sub> concentration estimation on February 11 with the ChinaHighNO<sub>2</sub> produced by Wei et al. [3]. (a-b) denote our new results and ChinaHighNO<sub>2</sub>, respectively.
